# Supplementary material for: Interactions between alkali cations and cyanide-bridged network in A2Co4[Fe(CN)6]3.3 Prussian blue analogues revealed by far-infrared spectroscopy
Source: Royal Society of Chemistry journal article supplement (doi:10.1039/d4ma00064a), 2024-01-01
Supplement: d4ma00064a1.pdf [file d4ma00064a1.pdf]

## Supplementary Materials for

### Interactions between alkali cations and cyanide-bridged network in $A_2Co_4[Fe(CN)_6]_{3.3}$ Prussian blue analogues revealed by far-infrared spectroscopy

Maria Dronova,<sup>a,b</sup> Laura Altenschmidt,<sup>a,b</sup> Amélie Bordage,<sup>a</sup> Jean-Blaise Brubach,<sup>b</sup> Marine Verseils,<sup>b</sup> Gregory Balthazar<sup>a</sup>, Pascale Roy<sup>b</sup> and Anne Bleuzen<sup>a\*</sup>

<sup>a</sup>Institut de chimie moléculaire et des matériaux d'Orsay (ICMMO), Université Paris-Saclay, 17 avenue des Science, 91400 Orsay, France

<sup>b</sup>Synchrotron SOLEIL, L'Orme des Merisiers Saint-Aubin, BP 48, 91192 Gif-sur-Yvette, France

**Figure S1.** FIR spectra of CoFe PBAs of chemical formula  $Cs_xCo_4[Fe(CN)_6]_{(8+x)/3} \cdot nH_2O$  at 300 K.

**Figure S2.** FIR spectra of **Na<sub>2</sub>CoFe**, **Rb<sub>2</sub>CoFe** and **Cs<sub>2</sub>CoFe** recorded upon cooling.

**Figure S3.** FIR spectra of **Rb<sub>2</sub>CoFe** at 300K before cooling and after 1 and 2 cooling/heating cycles.

**Figure S4.** Low temperature XANES spectra of **Na<sub>2</sub>CoFe**, **Rb<sub>2</sub>CoFe** and **Cs<sub>2</sub>CoFe** at the Co and Fe K-edges.

**Figure S5.** MIR spectra of **Na<sub>2</sub>CoFe**, **Rb<sub>2</sub>CoFe** and **Cs<sub>2</sub>CoFe** over the 3400-3800  $cm^{-1}$  frequency range.

**Table S1.** Frequency of absorbance maximum, full-width at half maximum and area under peak for the three Gaussian components (*G1*, *G2*, *G3*).

**Figure S1.** Far-IR spectra of CoFe PBAs of chemical formula  $\text{Cs}_x\text{Co}_4[\text{Fe}(\text{CN})_6]_{(8+x)/3} \cdot n\text{H}_2\text{O}$  at 300 K over the  $20\text{-}150\text{ cm}^{-1}$  frequency range, showing the variation of the band associated to the  $\text{Cs}^+$  vibration mode with an increasing  $\text{Cs}^+$  content  $x$  (and a decreasing amount of  $\text{Fe}(\text{CN})_6$  vacancies).

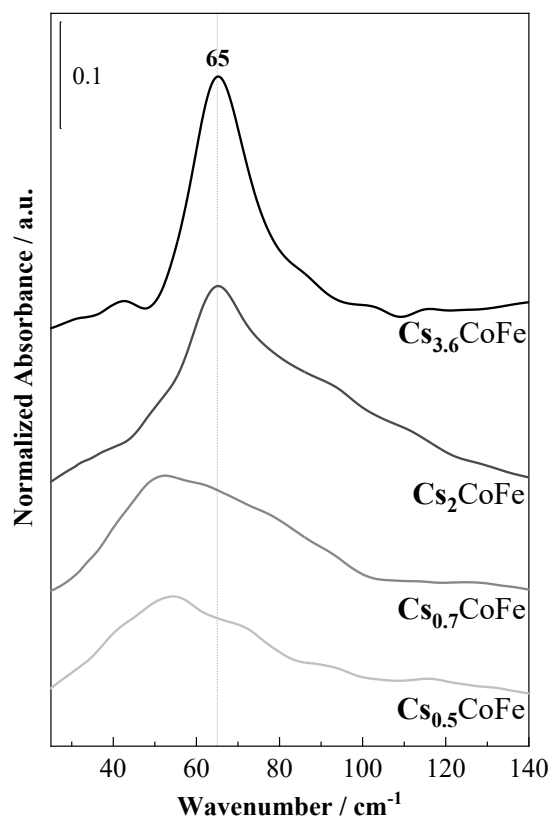

**Figure S2.** Far-Infrared spectra of **Na<sub>2</sub>CoFe**, **Rb<sub>2</sub>CoFe** and **Cs<sub>2</sub>CoFe** recorded upon cooling.

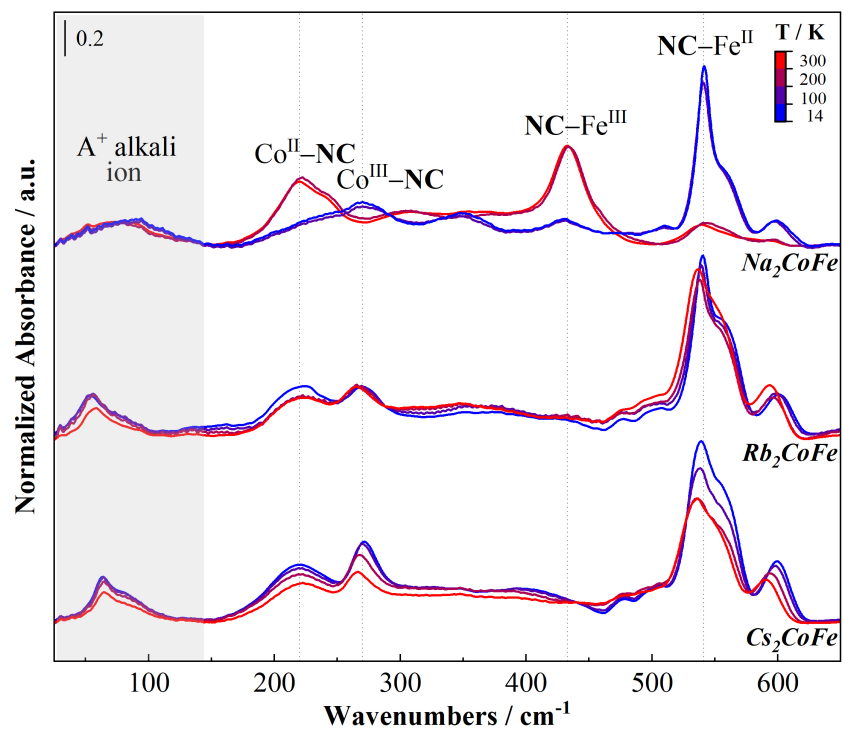

**Figure S3.** Far-Infrared spectra of **Rb<sub>2</sub>CoFe** at 300K before cooling and after 1 and 2 cooling/heating cycles.

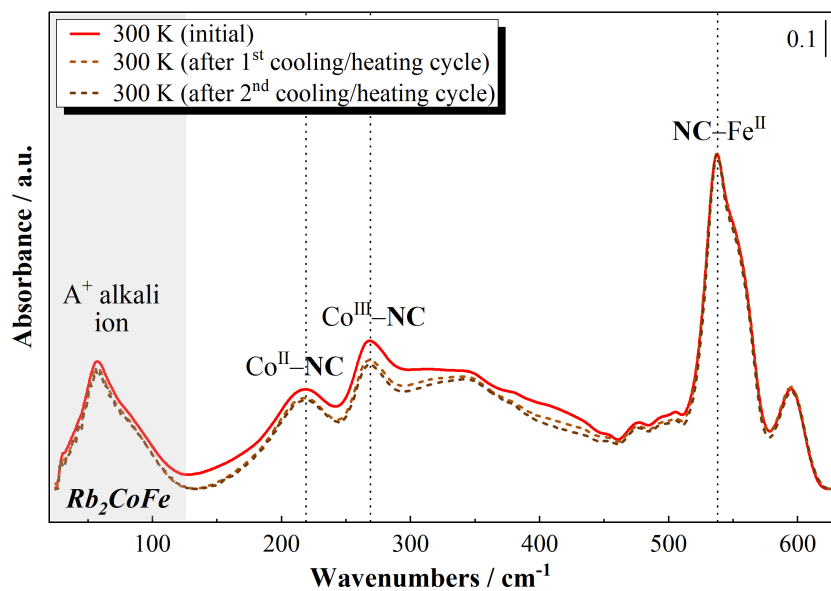

**Figure S4.** Low temperature X-ray Absorption Near Edge Spectra (XANES) of **Na<sub>2</sub>CoFe**, **Rb<sub>2</sub>CoFe** and **Cs<sub>2</sub>CoFe** a) at the Co K-edge and b) at the Fe K-edge.

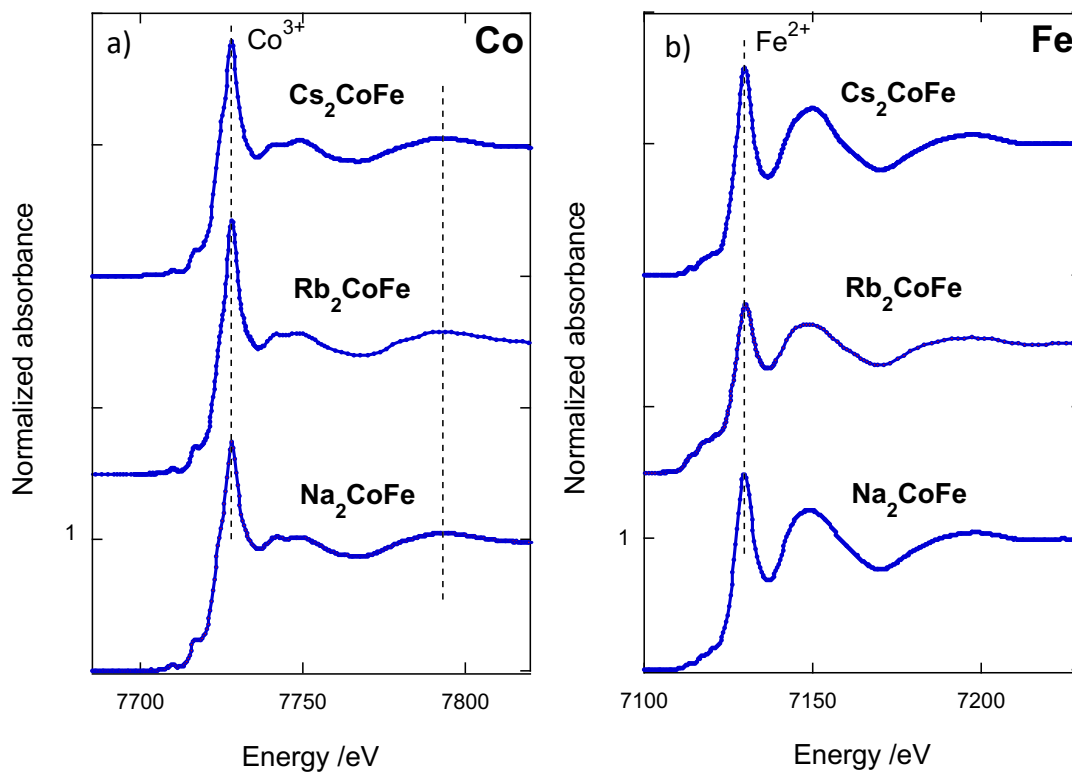

The shape of the spectra and the energy of the absorption maxima are characteristic of **Co<sup>III</sup>** ions and **Fe<sup>II</sup>(CN)<sub>6</sub>** entities in CoFe PBAs. The similarity of the spectra shows that all contain the same amount of these species, in line with the **Co<sup>II</sup><sub>0.7</sub>Co<sup>III</sup><sub>3.3</sub>[Fe<sup>II</sup>(CN)<sub>6</sub>]** chemical formula.

**Figure S5.** Middle-Infrared spectra of **Na<sub>2</sub>CoFe** (red), **Rb<sub>2</sub>CoFe** (blue) and **Cs<sub>2</sub>CoFe** (green) over the 3400-3800 cm<sup>-1</sup> frequency range at 14 K.

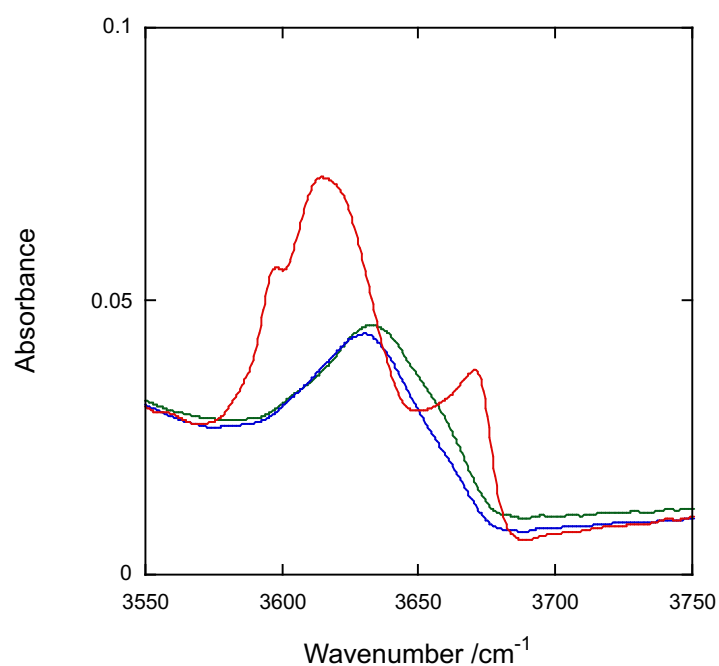

The bands situated between 3500 and 3700 cm<sup>-1</sup> correspond to stretching vibrations of OH bonds bound to the Co ions. The spectra of **Rb<sub>2</sub>CoFe** and **Cs<sub>2</sub>CoFe** are much different from the one of **Na<sub>2</sub>CoFe**.

**Table S1.** Frequency of absorbance maximum, full-width at half maximum and area under peak for the three Gaussian components (*G1*, *G2*, *G3*).

|                             | Na <sub>2</sub> CoFe |           |           | Rb <sub>2</sub> CoFe |           |           | Cs <sub>2</sub> CoFe |           |           |
|-----------------------------|----------------------|-----------|-----------|----------------------|-----------|-----------|----------------------|-----------|-----------|
|                             | <i>G1</i>            | <i>G2</i> | <i>G3</i> | <i>G1</i>            | <i>G2</i> | <i>G3</i> | <i>G1</i>            | <i>G2</i> | <i>G3</i> |
| Frequency /cm <sup>-1</sup> | 541                  | 558       | 600       | 539.5                | 559       | 601       | 536.5                | 557       | 600       |
| Linewidth /cm <sup>-1</sup> | 12.7                 | 24.6      | 23.2      | 16.2                 | 23.6      | 22.8      | 20.2                 | 27.9      | 22.3      |
| Area /%                     | 47                   | 38.5      | 14.5      | 41                   | 42        | 17        | 38                   | 45        | 17        |
